# Supplementary material for: Potassium-competitive acid blockers and proton-pump inhibitors for healing of erosive esophagitis: a systematic review and network meta-analysis
Source: PubMed Central journal article supplement — Ther Adv Gastroenterol. 2024 Jun 19;17:17562848241251567. doi: 10.1177/17562848241251567 (PMC11189022; doi:10.1177/17562848241251567), 2024-06-19
Supplement: sj-pdf-1-tag-10.1177_17562848241251567.pdf [file sj-pdf-1-tag-10.1177_17562848241251567.pdf]

## Supplementary Material S1. Searching Strategy

- #1 "Esophagitis, Peptic"[Mesh]
- #2 (Esophagitides, Peptic[Title/Abstract]) OR (Peptic Esophagitides[Title/Abstract]) OR (Peptic Esophagitis[Title/Abstract]) OR (Esophagitis, Reflux[Title/Abstract]) OR (Esophagitides, Reflux[Title/Abstract]) OR (Reflux Esophagitides[Title/Abstract]) OR (Reflux Esophagitis[Title/Abstract]) OR (Erosive esophagitis[Title/Abstract])
- #3 #1 OR #2
- #4 "Proton Pump Inhibitors"[Mesh]
- #5 Inhibitors, Proton Pump[Title/Abstract] OR (Proton Pump Inhibitor[Title/Abstract]) OR (Inhibitor, Proton Pump[Title/Abstract]) OR (Pump Inhibitor, Proton[Title/Abstract])
- #6 "Omeprazole"[Mesh]
- #7 (Prilosec[Title/Abstract]) OR (H 168-68[Title/Abstract]) OR (H 168 68[Title/Abstract]) OR (H 16868[Title/Abstract])
- #8 "Rabeprazole"[Mesh]
- #9 (2-((4-(3-methoxypropoxy)-3-methylpyridin-2-yl)methylsulfinyl)-1H-benzimidazole[Title/Abstract]) OR (Dexrabeprazole[Title/Abstract]) OR (E 3810[Title/Abstract]) OR (E3810[Title/Abstract]) OR (Pariet[Title/Abstract]) OR (Aciphex[Title/Abstract]) OR (LY-307640[Title/Abstract]) OR (LY 307640[Title/Abstract]) OR (LY307640[Title/Abstract])
- #10 "Lansoprazole"[Mesh]
- #11 (Lansoprazol[Title/Abstract]) OR (2-(((3-Methyl-4-(2,2,2-trifluoroethoxy)-2-pyridyl)methyl)sulfinyl)benzimidazole[Title/Abstract]) OR (Lansoprazoles[Title/Abstract]) OR (Ogastro[Title/Abstract]) OR (AG 1749[Title/Abstract]) OR (AG-1749[Title/Abstract]) OR (AG1749[Title/Abstract]) OR (Agopton[Title/Abstract]) OR (Bamalite[Title/Abstract]) OR (Lansol[Title/Abstract]) OR (Lanzor[Title/Abstract]) OR (Monolimum[Title/Abstract]) OR (Opiren[Title/Abstract]) OR (Prevacid[Title/Abstract]) OR (Pro Ulco[Title/Abstract]) OR (Promeco[Title/Abstract]) OR (Takepron[Title/Abstract]) OR (Ulpax[Title/Abstract]) OR (Zoton[Title/Abstract]) OR (Ogast[Title/Abstract]) OR (Prezal[Title/Abstract])
- #12 "Esomeprazole"[Mesh]
- #13 (Esomeprazole Sodium[Title/Abstract]) OR (Esomeprazole Strontium[Title/Abstract]) OR (Strontium, Esomeprazole[Title/Abstract]) OR (Esomeprazole Magnesium[Title/Abstract]) OR (Esomeprazole Potassium[Title/Abstract]) OR (Esomeprazole Strontium Anhydrous[Title/Abstract]) OR (Nexium[Title/Abstract])
- #14 "Pantoprazole"[Mesh]
- #15 (SKF-96022[Title/Abstract]) OR (SKF 96022[Title/Abstract]) OR (SKF96022[Title/Abstract]) OR (BY 1023[Title/Abstract]) OR (BY-1023[Title/Abstract]) OR (BY1023[Title/Abstract]) OR (Protonix[Title/Abstract])
- #16 "ilaprazole" [Supplementary Concept]
- #17 (IY 81149[Title/Abstract]) OR (IY81149[Title/Abstract]) OR (IY-81149[Title/Abstract])
- #18 ("1-(5-(2-fluorophenyl)-1-(pyridin-3-ylsulfonyl)-1H-pyrrol-3-yl)-N-methylmethanamine" [Supplementary Concept])
- #19 (Vonoprazan[Title/Abstract]) OR (TAK 438[Title/Abstract]) OR (TAK438[Title/Abstract]) OR (TAK-438[Title/Abstract])
- #20 "dexlansoprazole"[MeSH Terms]
- #21 (Delanzo[Title/Abstract]) OR (Dexilant[Title/Abstract]) OR (TAK 390MR[Title/Abstract]) OR

(Kapidex[Title/Abstract])

#22 (potassium competitive acid blocker[Title/Abstract]) OR (PCAB[Title/Abstract]) OR (acid pump antagonist[Title/Abstract])

#23 (Tegoprazan[Title/Abstract]) OR (LXI-15028[Title/Abstract]) OR (LXI 15028[Title/Abstract]) OR (LXI15028[Title/Abstract])

#24 (keverprazan[Title/Abstract]) or (H008[Title/Abstract])

#25 (YH1885L[Title/Abstract]) OR (Revaprazan[Title/Abstract])

#26 #4~#25 OR

#27 ("randomized controlled trial"[Publication Type] OR "controlled clinical trial"[Publication Type] OR "randomized"[Title/Abstract] OR "placebo"[Title/Abstract] OR "drug therapy"[MeSH Subheading] OR "randomly"[Title/Abstract] OR "trial"[Title/Abstract] OR "groups"[Title/Abstract]) NOT ("animals"[MeSH Terms] NOT "humans"[MeSH Terms])

#28 #3 AND #26 AND #27

(A)

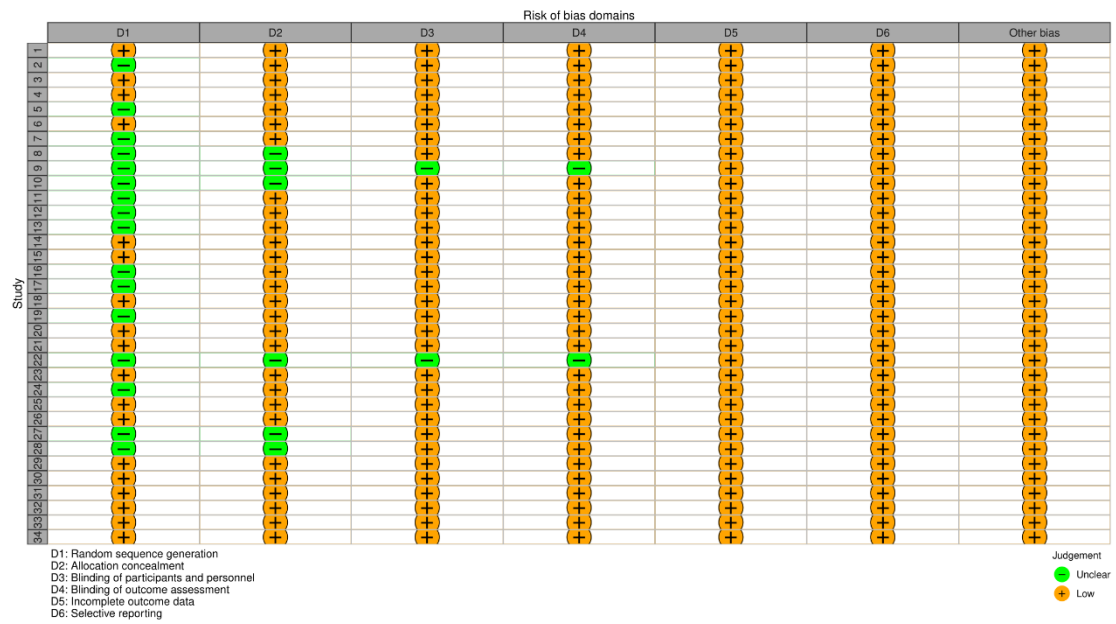

(B)

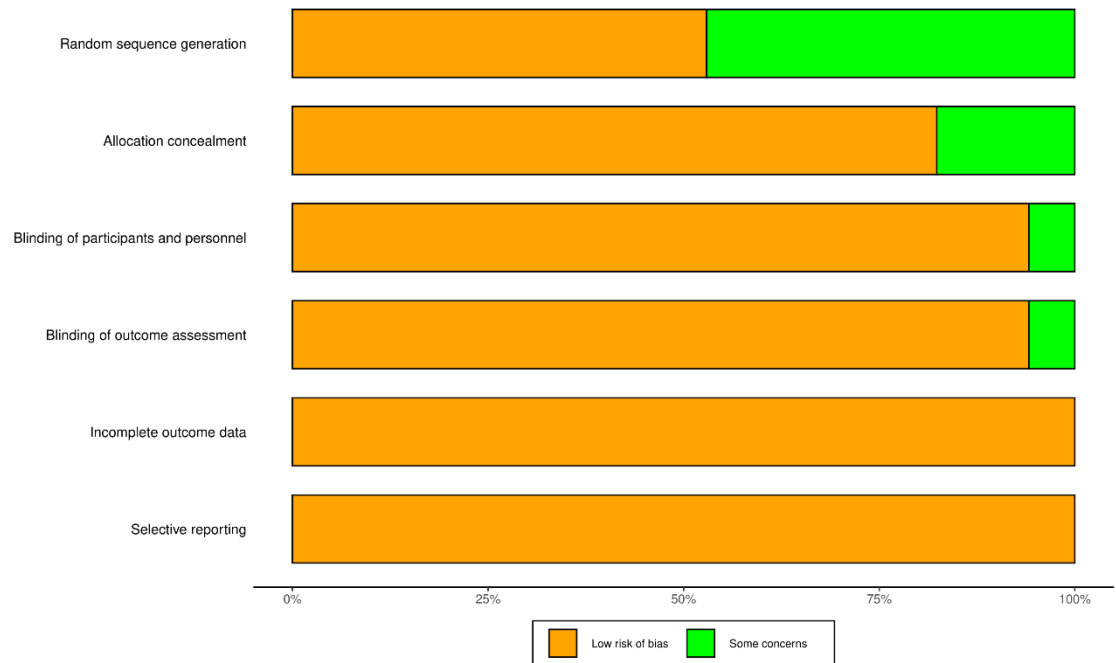

**Figure S1 Risk of bias for the included randomized controlled trials: (A) proportion of studies with each judgment and (B) all judgments in a cross-tabulation of studies by entry. The numerical values indicate Study IDs, which are consistent with those presented in Table 1.**

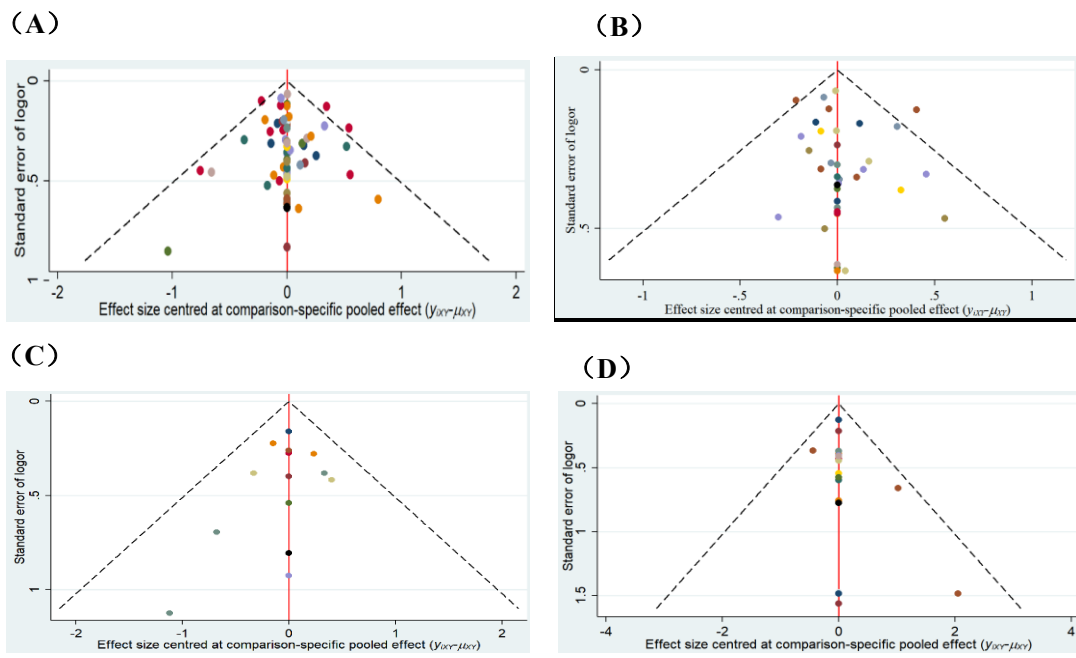

**Figure S2. Funnel plots for 4-week healing rate. (A) Main analysis. (B) Sensitivity analysis. (C) Subgroup analysis on patients without severe baseline grade. (D) Subgroup analysis on patients with severe baseline grade.**

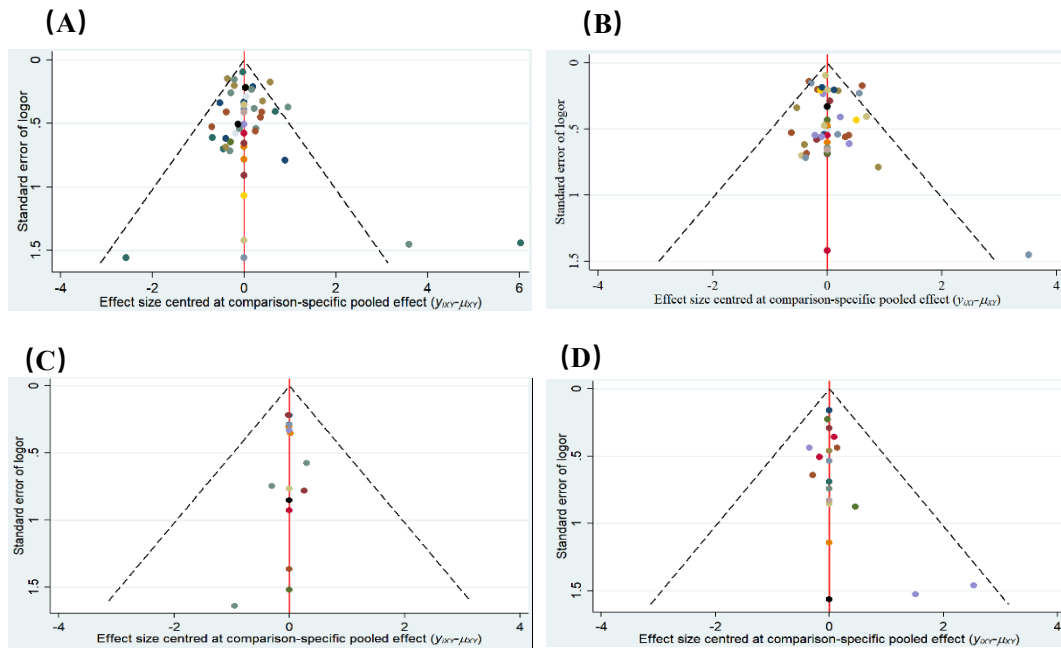

**Figure S3. Funnel plots for 8-week healing rate. (A) Main analysis. (B) Sensitivity analysis. (C) Subgroup analysis on patients without severe baseline grade. (D) Subgroup analysis on patients with severe baseline grade.**

**Table S1 Odds ratios of relative 4-week healing rate for each treatment in the main analysis**

|                                    |                       |                                   |                                   |                     |                                   |                       |                                   |                      |                                   |                       |                        |                       |
|------------------------------------|-----------------------|-----------------------------------|-----------------------------------|---------------------|-----------------------------------|-----------------------|-----------------------------------|----------------------|-----------------------------------|-----------------------|------------------------|-----------------------|
| Vpz40                              | 0.55<br>(0.17,1.76)   | 0.35<br>(0.10,1.26)               | <b>0.24</b><br><b>(0.06,0.99)</b> | 0.04<br>(0.01,0.13) | 0.41<br>(0.13,1.36)               | 0.45<br>(0.12,1.72)   | 0.36<br>(0.11,1.17)               | 0.37<br>(0.09,1.44)  | 0.40<br>(0.13,1.29)               | 0.43<br>(0.11,1.69)   | 0.94<br>(0.24,3.75)    | 0.54<br>(0.17,1.76)   |
| 1.83<br>(0.57,5.87)                | Vpz20                 | 0.65<br>(0.33,1.28)               | 0.43<br>(0.17,1.12)               | 0.07<br>(0.04,0.13) | 0.75<br>(0.45,1.28)               | 0.82<br>(0.36,1.85)   | 0.66<br>(0.39,1.09)               | 0.67<br>(0.29,1.56)  | 0.74<br>(0.47,1.16)               | 0.78<br>(0.33,1.85)   | 1.72<br>(0.71,4.13)    | 0.99<br>(0.60,1.63)   |
| 2.82<br>(0.79,10.05)               | 1.55<br>(0.78,3.06)   | Rab20                             | 0.67<br>(0.31,1.47)               | 0.11<br>(0.06,0.20) | 1.17<br>(0.69,1.95)               | 1.26<br>(0.57,2.78)   | 1.01<br>(0.64,1.60)               | 1.04<br>(0.44,2.46)  | 1.14<br>(0.68,1.90)               | 1.21<br>(0.49,2.94)   | 2.65<br>(1.11,6.34)    | 1.53<br>(0.93,2.49)   |
| <b>4.21</b><br><b>(1.01,17.61)</b> | 2.30<br>(0.89,5.95)   | 1.49<br>(0.68,3.27)               | Rab10                             | 0.17<br>(0.07,0.40) | 1.74<br>(0.75,4.02)               | 1.88<br>(0.67,5.27)   | 1.51<br>(0.68,3.37)               | 1.54<br>(0.52,4.58)  | 1.70<br>(0.74,3.91)               | 1.80<br>(0.59,5.46)   | 3.96<br>(1.33,11.79)   | 2.27<br>(1.00,5.18)   |
| 25.11<br>(7.45,84.63)              | 13.74<br>(7.74,24.41) | 8.89<br>(4.99,15.84)              | 5.97<br>(2.48,14.35)              | Placebo             | 10.36<br>(7.06,15.19)             | 11.22<br>(5.49,22.92) | 9.01<br>(6.30,12.87)              | 9.21<br>(4.51,18.82) | 10.13<br>(7.12,14.41)             | 10.72<br>(4.76,24.17) | 23.60<br>(10.54,52.85) | 13.56<br>(9.39,19.57) |
| 2.42<br>(0.74,7.99)                | 1.33<br>(0.78,2.25)   | 0.86<br>(0.51,1.44)               | 0.58<br>(0.25,1.33)               | 0.10<br>(0.07,0.14) | Pan40                             | 1.08<br>(0.54,2.15)   | 0.87<br>(0.68,1.11)               | 0.89<br>(0.42,1.88)  | 0.98<br>(0.75,1.28)               | 1.04<br>(0.47,2.26)   | 2.28<br>(1.08,4.81)    | 1.31<br>(1.06,1.61)   |
| 2.24<br>(0.58,8.61)                | 1.22<br>(0.54,2.77)   | 0.79<br>(0.36,1.74)               | 0.53<br>(0.19,1.49)               | 0.09<br>(0.04,0.18) | 0.92<br>(0.46,1.84)               | Ome40                 | 0.80<br>(0.42,1.53)               | 0.82<br>(0.31,2.16)  | 0.90<br>(0.46,1.78)               | 0.96<br>(0.35,2.60)   | 2.10<br>(0.79,5.61)    | 1.21<br>(0.62,2.36)   |
| 2.79<br>(0.85,9.12)                | 1.53<br>(0.92,2.54)   | 0.99<br>(0.63,1.55)               | 0.66<br>(0.30,1.48)               | 0.11<br>(0.08,0.16) | 1.15<br>(0.90,1.47)               | 1.25<br>(0.65,2.38)   | Ome20                             | 1.02<br>(0.49,2.13)  | 1.12<br>(0.89,1.42)               | 1.19<br>(0.55,2.57)   | 2.62<br>(1.25,5.50)    | 1.51<br>(1.25,1.82)   |
| 2.73<br>(0.70,10.67)               | 1.49<br>(0.64,3.48)   | 0.96<br>(0.41,2.29)               | 0.65<br>(0.22,1.92)               | 0.11<br>(0.05,0.22) | 1.12<br>(0.53,2.37)               | 1.22<br>(0.46,3.20)   | 0.98<br>(0.47,2.04)               | Lan60                | 1.10<br>(0.54,2.25)               | 1.16<br>(0.42,3.24)   | 2.56<br>(0.92,7.15)    | 1.47<br>(0.71,3.07)   |
| 2.48<br>(0.77,7.93)                | 1.36<br>(0.86,2.14)   | 0.88<br>(0.53,1.46)               | 0.59<br>(0.26,1.36)               | 0.10<br>(0.07,0.14) | 1.02<br>(0.78,1.34)               | 1.11<br>(0.56,2.19)   | 0.89<br>(0.71,1.12)               | 0.91<br>(0.45,1.86)  | Lan30                             | 1.06<br>(0.51,2.20)   | 2.33<br>(1.10,4.93)    | 1.34<br>(1.07,1.67)   |
| 2.34<br>(0.59,9.26)                | 1.28<br>(0.54,3.03)   | 0.83<br>(0.34,2.02)               | 0.56<br>(0.18,1.69)               | 0.09<br>(0.04,0.21) | 0.97<br>(0.44,2.11)               | 1.05<br>(0.39,2.84)   | 0.84<br>(0.39,1.81)               | 0.86<br>(0.31,2.39)  | 0.94<br>(0.45,1.97)               | Kev20                 | 2.20<br>(0.77,6.28)    | 1.26<br>(0.59,2.72)   |
| 1.06<br>(0.27,4.25)                | 0.58<br>(0.24,1.40)   | <b>0.38</b><br><b>(0.16,0.90)</b> | <b>0.25</b><br><b>(0.08,0.75)</b> | 0.04<br>(0.02,0.09) | <b>0.44</b><br><b>(0.21,0.93)</b> | 0.48<br>(0.18,1.27)   | <b>0.38</b><br><b>(0.18,0.80)</b> | 0.39<br>(0.14,1.09)  | <b>0.43</b><br><b>(0.20,0.91)</b> | 0.45<br>(0.16,1.30)   | Ila10                  | 0.57<br>(0.28,1.18)   |
| 1.85<br>(0.57,6.05)                | 1.01<br>(0.61,1.68)   | 0.66<br>(0.40,1.07)               | <b>0.44</b><br><b>(0.19,1.00)</b> | 0.07<br>(0.05,0.11) | <b>0.76</b><br><b>(0.62,0.94)</b> | 0.83<br>(0.42,1.62)   | <b>0.66</b><br><b>(0.55,0.80)</b> | 0.68<br>(0.33,1.42)  | <b>0.75</b><br><b>(0.60,0.93)</b> | 0.79<br>(0.37,1.70)   | 1.74<br>(0.85,3.57)    | Eso40                 |

**Table S2 Odds ratios of relative 4-week healing rate for each treatment in the sensitivity analysis**

|                                    |                       |                       |                       |                      |                      |                     |                       |                       |                      |                      |                       |                       |                       |                       |                       |
|------------------------------------|-----------------------|-----------------------|-----------------------|----------------------|----------------------|---------------------|-----------------------|-----------------------|----------------------|----------------------|-----------------------|-----------------------|-----------------------|-----------------------|-----------------------|
| Vpz40                              | 0.55<br>(0.17,1.76)   | 0.54<br>(0.12,2.42)   | 0.68<br>(0.15,3.12)   | 0.35<br>(0.10,1.27)  | 0.24<br>(0.06,1.00)  | 0.04<br>(0.01,0.13) | 0.41<br>(0.12,1.37)   | 0.45<br>(0.12,1.73)   | 0.36<br>(0.11,1.18)  | 0.37<br>(0.09,1.44)  | 0.40<br>(0.13,1.29)   | 0.43<br>(0.11,1.70)   | 0.62<br>(0.17,2.18)   | 0.65<br>(0.14,2.99)   | 0.54<br>(0.16,1.77)   |
| 1.83<br>(0.57,5.88)                | Vpz20                 | 0.99<br>(0.35,2.81)   | 1.25<br>(0.43,3.66)   | 0.65<br>(0.33,1.29)  | 0.43<br>(0.17,1.13)  | 0.07<br>(0.04,0.13) | 0.75<br>(0.44,1.28)   | 0.82<br>(0.36,1.86)   | 0.66<br>(0.39,1.10)  | 0.67<br>(0.29,1.57)  | 0.74<br>(0.47,1.16)   | 0.78<br>(0.33,1.86)   | 1.13<br>(0.58,2.19)   | 1.20<br>(0.41,3.50)   | 0.99<br>(0.59,1.64)   |
| 1.85<br>(0.41,8.29)                | 1.01<br>(0.36,2.89)   | Teg50                 | 1.27<br>(0.49,3.27)   | 0.66<br>(0.23,1.86)  | 0.44<br>(0.13,1.51)  | 0.07<br>(0.03,0.20) | 0.76<br>(0.30,1.96)   | 0.83<br>(0.27,2.58)   | 0.67<br>(0.26,1.69)  | 0.68<br>(0.21,2.20)  | 0.75<br>(0.29,1.92)   | 0.79<br>(0.24,2.61)   | 1.14<br>(0.42,3.13)   | 1.21<br>(0.33,4.52)   | 1.00<br>(0.40,2.50)   |
| 1.46<br>(0.32,6.68)                | 0.80<br>(0.27,2.35)   | 0.79<br>(0.31,2.04)   | Teg100                | 0.52<br>(0.18,1.51)  | 0.35<br>(0.10,1.22)  | 0.06<br>(0.02,0.16) | 0.60<br>(0.23,1.59)   | 0.65<br>(0.20,2.09)   | 0.52<br>(0.20,1.38)  | 0.54<br>(0.16,1.78)  | 0.59<br>(0.22,1.56)   | 0.62<br>(0.18,2.12)   | 0.90<br>(0.32,2.55)   | 0.96<br>(0.25,3.65)   | 0.79<br>(0.31,2.04)   |
| 2.82<br>(0.79,10.09)               | 1.55<br>(0.78,3.07)   | 1.52<br>(0.54,4.31)   | 1.93<br>(0.66,5.63)   | Rab20                | 0.67<br>(0.30,1.48)  | 0.11<br>(0.06,0.20) | 1.16<br>(0.69,1.96)   | 1.26<br>(0.57,2.80)   | 1.01<br>(0.64,1.60)  | 1.04<br>(0.43,2.47)  | 1.14<br>(0.68,1.90)   | 1.21<br>(0.49,2.96)   | 1.74<br>(0.91,3.34)   | 1.85<br>(0.64,5.38)   | 1.52<br>(0.93,2.50)   |
| <b>4.21</b><br><b>(1.00,17.68)</b> | 2.30<br>(0.89,5.99)   | 2.27<br>(0.66,7.80)   | 2.88<br>(0.82,10.13)  | 1.49<br>(0.68,3.29)  | Rab10                | 0.17<br>(0.07,0.41) | 1.74<br>(0.75,4.04)   | 1.88<br>(0.67,5.30)   | 1.51<br>(0.67,3.38)  | 1.54<br>(0.52,4.60)  | 1.70<br>(0.73,3.93)   | 1.80<br>(0.59,5.49)   | 2.59<br>(1.02,6.58)   | 2.75<br>(0.78,9.68)   | 2.27<br>(0.99,5.20)   |
| 25.10<br>(7.42,84.92)              | 13.75<br>(7.70,24.54) | 13.55<br>(5.05,36.37) | 17.17<br>(6.20,47.51) | 8.89<br>(4.97,15.92) | 5.97<br>(2.47,14.43) | Placebo             | 10.36<br>(7.04,15.25) | 11.23<br>(5.47,23.07) | 9.01<br>(6.28,12.93) | 9.21<br>(4.49,18.89) | 10.12<br>(7.09,14.45) | 10.72<br>(4.73,24.30) | 15.48<br>(8.80,27.23) | 16.44<br>(5.95,45.41) | 13.55<br>(9.35,19.65) |
| 2.42<br>(0.73,8.02)                | 1.33<br>(0.78,2.26)   | 1.31<br>(0.51,3.35)   | 1.66<br>(0.63,4.38)   | 0.86<br>(0.51,1.45)  | 0.58<br>(0.25,1.34)  | 0.10<br>(0.07,0.14) | Pan40                 | 1.08<br>(0.54,2.17)   | 0.87<br>(0.68,1.12)  | 0.89<br>(0.42,1.88)  | 0.98<br>(0.74,1.28)   | 1.03<br>(0.47,2.27)   | 1.49<br>(0.93,2.40)   | 1.59<br>(0.60,4.18)   | 1.31<br>(1.06,1.62)   |

|                          |                     |                     |                     |                     |                                   |                     |                                   |                     |                                   |                     |                                   |                     |                     |                     |                     |
|--------------------------|---------------------|---------------------|---------------------|---------------------|-----------------------------------|---------------------|-----------------------------------|---------------------|-----------------------------------|---------------------|-----------------------------------|---------------------|---------------------|---------------------|---------------------|
| 2.24<br>(0.58,8.64)      | 1.22<br>(0.54,2.79) | 1.21<br>(0.39,3.76) | 1.53<br>(0.48,4.90) | 0.79<br>(0.36,1.75) | 0.53<br>(0.19,1.50)               | 0.09<br>(0.04,0.18) | 0.92<br>(0.46,1.84)               | Ome40               | 0.80<br>(0.42,1.54)               | 0.82<br>(0.31,2.17) | 0.90<br>(0.45,1.79)               | 0.95<br>(0.35,2.61) | 1.38<br>(0.62,3.06) | 1.46<br>(0.46,4.68) | 1.21<br>(0.61,2.37) |
| 2.79<br>(0.85,9.15)      | 1.53<br>(0.91,2.55) | 1.50<br>(0.59,3.83) | 1.90<br>(0.72,5.01) | 0.99<br>(0.62,1.56) | 0.66<br>(0.30,1.48)               | 0.11<br>(0.08,0.16) | 1.15<br>(0.89,1.48)               | 1.25<br>(0.65,2.39) | Ome20                             | 1.02<br>(0.49,2.14) | 1.12<br>(0.89,1.42)               | 1.19<br>(0.55,2.58) | 1.72<br>(1.08,2.74) | 1.82<br>(0.69,4.79) | 1.50<br>(1.24,1.82) |
| 2.73<br>(0.69,10.72<br>) | 1.49<br>(0.64,3.50) | 1.47<br>(0.45,4.77) | 1.86<br>(0.56,6.20) | 0.97<br>(0.41,2.30) | 0.65<br>(0.22,1.93)               | 0.11<br>(0.05,0.22) | 1.12<br>(0.53,2.38)               | 1.22<br>(0.46,3.23) | 0.98<br>(0.47,2.05)               | Lan60               | 1.10<br>(0.54,2.25)               | 1.16<br>(0.42,3.26) | 1.68<br>(0.72,3.95) | 1.78<br>(0.54,5.93) | 1.47<br>(0.70,3.08) |
| 2.48<br>(0.77,7.96)      | 1.36<br>(0.86,2.15) | 1.34<br>(0.52,3.43) | 1.70<br>(0.64,4.49) | 0.88<br>(0.53,1.47) | 0.59<br>(0.25,1.36)               | 0.10<br>(0.07,0.14) | 1.02<br>(0.78,1.34)               | 1.11<br>(0.56,2.20) | 0.89<br>(0.70,1.13)               | 0.91<br>(0.44,1.87) | Lan30                             | 1.06<br>(0.51,2.21) | 1.53<br>(0.94,2.48) | 1.62<br>(0.61,4.29) | 1.34<br>(1.07,1.68) |
| 2.34<br>(0.59,9.30)      | 1.28<br>(0.54,3.06) | 1.26<br>(0.38,4.18) | 1.60<br>(0.47,5.43) | 0.83<br>(0.34,2.04) | 0.56<br>(0.18,1.70)               | 0.09<br>(0.04,0.21) | 0.97<br>(0.44,2.12)               | 1.05<br>(0.38,2.87) | 0.84<br>(0.39,1.82)               | 0.86<br>(0.31,2.41) | 0.94<br>(0.45,1.97)               | Kev20               | 1.44<br>(0.60,3.49) | 1.53<br>(0.45,5.20) | 1.26<br>(0.59,2.73) |
| 1.62<br>(0.46,5.72)      | 0.89<br>(0.46,1.72) | 0.88<br>(0.32,2.40) | 1.11<br>(0.39,3.14) | 0.57<br>(0.30,1.10) | <b>0.39</b><br><b>(0.15,0.98)</b> | 0.06<br>(0.04,0.11) | 0.67<br>(0.42,1.08)               | 0.73<br>(0.33,1.61) | <b>0.58</b><br><b>(0.37,0.93)</b> | 0.59<br>(0.25,1.40) | 0.65<br>(0.40,1.06)               | 0.69<br>(0.29,1.67) | Ila10               | 1.06<br>(0.38,3.00) | 0.88<br>(0.57,1.34) |
| 1.53<br>(0.33,6.97)      | 0.84<br>(0.29,2.45) | 0.82<br>(0.22,3.07) | 1.04<br>(0.27,3.98) | 0.54<br>(0.19,1.57) | 0.36<br>(0.10,1.28)               | 0.06<br>(0.02,0.17) | 0.63<br>(0.24,1.66)               | 0.68<br>(0.21,2.18) | 0.55<br>(0.21,1.44)               | 0.56<br>(0.17,1.86) | 0.62<br>(0.23,1.63)               | 0.65<br>(0.19,2.21) | 0.94<br>(0.33,2.66) | Fex40               | 0.82<br>(0.32,2.12) |
| 1.85<br>(0.57,6.07)      | 1.01<br>(0.61,1.69) | 1.00<br>(0.40,2.50) | 1.27<br>(0.49,3.27) | 0.66<br>(0.40,1.08) | 0.44<br>(0.19,1.01)               | 0.07<br>(0.05,0.11) | <b>0.76</b><br><b>(0.62,0.95)</b> | 0.83<br>(0.42,1.63) | <b>0.67</b><br><b>(0.55,0.81)</b> | 0.68<br>(0.32,1.42) | <b>0.75</b><br><b>(0.60,0.93)</b> | 0.79<br>(0.37,1.71) | 1.14<br>(0.75,1.75) | 1.21<br>(0.47,3.12) | Eso40               |



**Table S3 Odds ratios of relative 4-week healing rate for each treatment in the subgroup analysis on patients without severe baseline grade**

|                        |                       |                     |                      |                       |                       |                       |                   |
|------------------------|-----------------------|---------------------|----------------------|-----------------------|-----------------------|-----------------------|-------------------|
| Vpz40                  | 0.32 (0.07,1.49)      | 0.03<br>(0.01,0.16) | 0.24<br>(0.04,1.38)  | 0.29 (0.06,1.55)      | 0.42 (0.08,2.09)      | 0.50 (0.07,3.46)      | 0.27 (0.05,1.49)  |
| 3.15 (0.67,14.76)      | Vpz20                 | 0.09<br>(0.04,0.21) | 0.76<br>(0.30,1.94)  | 0.92 (0.42,2.02)      | 1.31 (0.67,2.55)      | 1.57 (0.45,5.54)      | 0.85 (0.35,2.04)  |
| 35.16<br>(6.44,192.05) | 11.18<br>(4.76,26.22) | Placebo             | 8.55<br>(4.33,16.88) | 10.31<br>(6.33,16.81) | 14.65<br>(8.84,24.28) | 17.59<br>(5.40,57.35) | 9.46 (5.22,17.11) |
| 4.11 (0.72,23.39)      | 1.31 (0.52,3.32)      | 0.12<br>(0.06,0.23) | Pan40                | 1.21 (0.75,1.93)      | 1.71 (0.94,3.14)      | 2.06 (0.60,7.03)      | 1.11 (0.67,1.83)  |
| 3.41 (0.65,18.01)      | 1.08 (0.49,2.38)      | 0.10<br>(0.06,0.16) | 0.83<br>(0.52,1.33)  | Ome20                 | 1.42 (0.98,2.05)      | 1.71 (0.55,5.28)      | 0.92 (0.66,1.28)  |
| 2.40 (0.48,12.03)      | 0.76 (0.39,1.48)      | 0.07<br>(0.04,0.11) | 0.58<br>(0.32,1.07)  | 0.70 (0.49,1.02)      | Lan30                 | 1.20 (0.41,3.49)      | 0.65 (0.39,1.07)  |
| 2.00 (0.29,13.83)      | 0.64 (0.18,2.24)      | 0.06<br>(0.02,0.19) | 0.49<br>(0.14,1.66)  | 0.59 (0.19,1.81)      | 0.83 (0.29,2.42)      | Kev20                 | 0.54 (0.16,1.76)  |
| 3.72 (0.67,20.58)      | 1.18 (0.49,2.85)      | 0.11<br>(0.06,0.19) | 0.90<br>(0.55,1.50)  | 1.09 (0.78,1.52)      | 1.55 (0.93,2.58)      | 1.86 (0.57,6.08)      | Eso40             |

**Table S4 Odds ratios of relative 4-week healing rate for each treatment in the subgroup analysis on patients with severe baseline grade**

|                        |                                   |                     |                       |                                   |                       |                                   |                       |                        |
|------------------------|-----------------------------------|---------------------|-----------------------|-----------------------------------|-----------------------|-----------------------------------|-----------------------|------------------------|
| Vpz40                  | 0.79<br>(0.16,3.91)               | 0.03<br>(0.01,0.15) | 0.41<br>(0.07,2.38)   | 0.35<br>(0.08,1.63)               | 0.31<br>(0.06,1.63)   | 0.38<br>(0.08,1.70)               | 0.49<br>(0.07,3.40)   | 0.56<br>(0.12,2.57)    |
| 1.27<br>(0.26,6.28)    | Vpz20                             | 0.04<br>(0.02,0.09) | 0.52<br>(0.18,1.56)   | 0.44<br>(0.22,0.89)               | 0.39<br>(0.15,1.01)   | 0.48<br>(0.26,0.89)               | 0.62<br>(0.16,2.45)   | 0.71<br>(0.37,1.37)    |
| 33.76<br>(6.78,168.03) | 26.65<br>(11.52,61.64)            | Placebo             | 13.93<br>(4.88,39.77) | 11.85<br>(6.43,21.83)             | 10.35<br>(4.94,21.69) | 12.81<br>(7.23,22.70)             | 16.47<br>(4.22,64.22) | 19.00<br>(10.39,34.76) |
| 2.42<br>(0.42,13.96)   | 1.91<br>(0.64,5.70)               | 0.07<br>(0.03,0.20) | Pan40                 | 0.85<br>(0.35,2.04)               | 0.74<br>(0.23,2.36)   | 0.92<br>(0.37,2.27)               | 1.18<br>(0.26,5.46)   | 1.36<br>(0.56,3.33)    |
| 2.85<br>(0.61,13.20)   | <b>2.25</b><br><b>(1.13,4.49)</b> | 0.08<br>(0.05,0.16) | 1.18<br>(0.49,2.82)   | Ome20                             | 0.87<br>(0.40,1.91)   | 1.08<br>(0.78,1.49)               | 1.39<br>(0.39,4.98)   | 1.60<br>(1.17,2.20)    |
| 3.26<br>(0.61,17.34)   | 2.58<br>(0.99,6.71)               | 0.10<br>(0.05,0.20) | 1.35<br>(0.42,4.28)   | 1.15<br>(0.52,2.51)               | Lan60                 | 1.24<br>(0.59,2.58)               | 1.59<br>(0.38,6.70)   | 1.84<br>(0.85,3.95)    |
| 2.64<br>(0.59,11.80)   | <b>2.08</b><br><b>(1.13,3.84)</b> | 0.08<br>(0.04,0.14) | 1.09<br>(0.44,2.68)   | 0.93<br>(0.67,1.28)               | 0.81<br>(0.39,1.68)   | Lan30                             | 1.29<br>(0.37,4.42)   | 1.48<br>(1.18,1.87)    |
| 2.05<br>(0.29,14.30)   | 1.62<br>(0.41,6.42)               | 0.06<br>(0.02,0.24) | 0.85<br>(0.18,3.91)   | 0.72<br>(0.20,2.58)               | 0.63<br>(0.15,2.64)   | 0.78<br>(0.23,2.67)               | Kev20                 | 1.15<br>(0.33,4.05)    |
| 1.78<br>(0.39,8.10)    | 1.40<br>(0.73,2.70)               | 0.05<br>(0.03,0.10) | 0.73<br>(0.30,1.79)   | <b>0.62</b><br><b>(0.45,0.86)</b> | 0.54<br>(0.25,1.17)   | <b>0.67</b><br><b>(0.54,0.85)</b> | 0.87<br>(0.25,3.04)   | Eso40                  |

**Table S5 Odds ratios of relative 8-week healing rate for each treatment in the main analysis**

|                       |                                   |                      |                      |                     |                       |                       |                                   |                       |                                   |                        |                       |                        |
|-----------------------|-----------------------------------|----------------------|----------------------|---------------------|-----------------------|-----------------------|-----------------------------------|-----------------------|-----------------------------------|------------------------|-----------------------|------------------------|
| Vpz40                 | 1.03<br>(0.28,3.77)               | 0.40<br>(0.09,1.81)  | 0.36<br>(0.06,1.99)  | 0.04<br>(0.01,0.16) | 0.67<br>(0.17,2.58)   | 0.51<br>(0.11,2.42)   | 0.49<br>(0.13,1.85)               | 0.45<br>(0.09,2.27)   | 0.55<br>(0.15,1.99)               | 1.40<br>(0.24,8.29)    | 1.21<br>(0.23,6.35)   | 0.85<br>(0.22,3.21)    |
| 0.97<br>(0.27,3.54)   | Vpz20                             | 0.38<br>(0.15,0.99)  | 0.35<br>(0.10,1.19)  | 0.04<br>(0.02,0.08) | 0.65<br>(0.34,1.22)   | 0.50<br>(0.18,1.34)   | 0.47<br>(0.26,0.86)               | 0.43<br>(0.14,1.31)   | 0.53<br>(0.33,0.87)               | 1.36<br>(0.36,5.08)    | 1.17<br>(0.37,3.72)   | 0.82<br>(0.45,1.49)    |
| 2.52<br>(0.55,11.53)  | <b>2.60</b><br><b>(1.01,6.68)</b> | Rab20                | 0.90<br>(0.32,2.57)  | 0.10<br>(0.04,0.25) | 1.69<br>(0.74,3.84)   | 1.30<br>(0.44,3.86)   | 1.23<br>(0.60,2.55)               | 1.13<br>(0.32,3.92)   | 1.38<br>(0.62,3.10)               | 3.54<br>(0.82,15.31)   | 3.04<br>(0.86,10.80)  | 2.13<br>(0.97,4.71)    |
| 2.80<br>(0.50,15.60)  | 2.89<br>(0.84,9.96)               | 1.11<br>(0.39,3.16)  | Rab10                | 0.12<br>(0.04,0.38) | 1.87<br>(0.59,5.91)   | 1.44<br>(0.37,5.57)   | 1.37<br>(0.46,4.04)               | 1.25<br>(0.28,5.51)   | 1.54<br>(0.49,4.79)               | 3.93<br>(0.74,20.86)   | 3.37<br>(0.75,15.12)  | 2.37<br>(0.77,7.31)    |
| 24.03<br>(6.12,94.38) | 24.80<br>(12.66,48.58)            | 9.53<br>(4.03,22.50) | 8.59<br>(2.65,27.83) | Placebo             | 16.07<br>(9.77,26.44) | 12.35<br>(5.23,29.14) | 11.74<br>(7.43,18.55)             | 10.73<br>(4.09,28.16) | 13.19<br>(8.33,20.89)             | 33.73<br>(9.13,124.57) | 28.97<br>(9.58,87.62) | 20.34<br>(12.42,33.32) |
| 1.50<br>(0.39,5.76)   | 1.54<br>(0.82,2.90)               | 0.59<br>(0.26,1.35)  | 0.53<br>(0.17,1.69)  | 0.06<br>(0.04,0.10) | Pan40                 | 0.77<br>(0.32,1.85)   | 0.73<br>(0.50,1.07)               | 0.67<br>(0.24,1.87)   | 0.82<br>(0.55,1.22)               | 2.10<br>(0.58,7.60)    | 1.80<br>(0.63,5.15)   | 1.27<br>(0.89,1.79)    |
| 1.95<br>(0.41,9.17)   | 2.01<br>(0.74,5.42)               | 0.77<br>(0.26,2.30)  | 0.70<br>(0.18,2.69)  | 0.08<br>(0.03,0.19) | 1.30<br>(0.54,3.14)   | Ome40                 | 0.95<br>(0.42,2.14)               | 0.87<br>(0.25,3.07)   | 1.07<br>(0.45,2.53)               | 2.73<br>(0.61,12.20)   | 2.35<br>(0.63,8.71)   | 1.65<br>(0.70,3.89)    |
| 2.05<br>(0.54,7.77)   | <b>2.11</b><br><b>(1.16,3.85)</b> | 0.81<br>(0.39,1.68)  | 0.73<br>(0.25,2.16)  | 0.09<br>(0.05,0.13) | 1.37<br>(0.93,2.01)   | 1.05<br>(0.47,2.37)   | Ome20                             | 0.91<br>(0.33,2.52)   | 1.12<br>(0.80,1.59)               | 2.87<br>(0.81,10.24)   | 2.47<br>(0.87,6.97)   | 1.73<br>(1.27,2.36)    |
| 2.24<br>(0.44,11.38)  | 2.31<br>(0.76,6.99)               | 0.89<br>(0.26,3.09)  | 0.80<br>(0.18,3.53)  | 0.09<br>(0.04,0.24) | 1.50<br>(0.53,4.21)   | 1.15<br>(0.33,4.06)   | 1.09<br>(0.40,3.01)               | Lan60                 | 1.23<br>(0.46,3.31)               | 3.14<br>(0.65,15.17)   | 2.70<br>(0.65,11.23)  | 1.90<br>(0.68,5.28)    |
| 1.82<br>(0.50,6.61)   | <b>1.88</b><br><b>(1.15,3.07)</b> | 0.72<br>(0.32,1.62)  | 0.65<br>(0.21,2.03)  | 0.08<br>(0.05,0.12) | 1.22<br>(0.82,1.82)   | 0.94<br>(0.40,2.22)   | 0.89<br>(0.63,1.26)               | 0.81<br>(0.30,2.19)   | Lan30                             | 2.56<br>(0.75,8.69)    | 2.20<br>(0.77,6.28)   | 1.54<br>(1.09,2.18)    |
| 0.71<br>(0.12,4.21)   | 0.74<br>(0.20,2.75)               | 0.28<br>(0.07,1.22)  | 0.25<br>(0.05,1.35)  | 0.03<br>(0.01,0.11) | 0.48<br>(0.13,1.73)   | 0.37<br>(0.08,1.63)   | 0.35<br>(0.10,1.24)               | 0.32<br>(0.07,1.54)   | 0.39<br>(0.12,1.33)               | Kev20                  | 0.86<br>(0.17,4.30)   | 0.60<br>(0.17,2.15)    |
| 0.83<br>(0.16,4.37)   | 0.86<br>(0.27,2.73)               | 0.33<br>(0.09,1.17)  | 0.30<br>(0.07,1.33)  | 0.03<br>(0.01,0.10) | 0.55<br>(0.19,1.59)   | 0.43<br>(0.11,1.58)   | 0.41<br>(0.14,1.14)               | 0.37<br>(0.09,1.54)   | 0.46<br>(0.16,1.30)               | 1.16<br>(0.23,5.84)    | Ila10                 | 0.70<br>(0.26,1.89)    |
| 1.18<br>(0.31,4.49)   | 1.22<br>(0.67,2.22)               | 0.47<br>(0.21,1.03)  | 0.42<br>(0.14,1.30)  | 0.05<br>(0.03,0.08) | 0.79<br>(0.56,1.12)   | 0.61<br>(0.26,1.43)   | <b>0.58</b><br><b>(0.42,0.79)</b> | 0.53<br>(0.19,1.47)   | <b>0.65</b><br><b>(0.46,0.92)</b> | 1.66<br>(0.47,5.91)    | 1.42<br>(0.53,3.84)   | Eso40                  |

**Table S6 Odds ratios of relative 8-week healing rate for each treatment in the sensitivity analysis**

|                       |                                   |                        |                        |                      |                      |                     |                       |                       |                       |                       |                       |                        |                        |                        |                        |
|-----------------------|-----------------------------------|------------------------|------------------------|----------------------|----------------------|---------------------|-----------------------|-----------------------|-----------------------|-----------------------|-----------------------|------------------------|------------------------|------------------------|------------------------|
| Vpz40                 | 1.03<br>(0.28,3.74)               | 1.55<br>(0.23,10.58)   | 1.26<br>(0.19,8.11)    | 0.40<br>(0.09,1.79)  | 0.36<br>(0.06,1.97)  | 0.04<br>(0.01,0.16) | 0.67<br>(0.17,2.56)   | 0.51<br>(0.11,2.39)   | 0.49<br>(0.13,1.84)   | 0.45<br>(0.09,2.24)   | 0.55<br>(0.15,1.98)   | 1.40<br>(0.24,8.21)    | 0.99<br>(0.23,4.24)    | 0.82<br>(0.04,18.79)   | 0.85<br>(0.22,3.19)    |
| 0.97<br>(0.27,3.51)   | Vpz20                             | 1.51<br>(0.33,6.79)    | 1.22<br>(0.29,5.12)    | 0.38<br>(0.15,0.98)  | 0.35<br>(0.10,1.18)  | 0.04<br>(0.02,0.08) | 0.65<br>(0.35,1.21)   | 0.50<br>(0.19,1.32)   | 0.47<br>(0.26,0.85)   | 0.43<br>(0.14,1.29)   | 0.53<br>(0.33,0.86)   | 1.36<br>(0.37,5.03)    | 0.96<br>(0.42,2.21)    | 0.79<br>(0.04,14.41)   | 0.82<br>(0.45,1.48)    |
| 0.64<br>(0.09,4.38)   | 0.66<br>(0.15,2.99)               | Teg50                  | 0.81<br>(0.19,3.49)    | 0.25<br>(0.05,1.25)  | 0.23<br>(0.04,1.36)  | 0.03<br>(0.01,0.12) | 0.43<br>(0.10,1.79)   | 0.33<br>(0.07,1.67)   | 0.31<br>(0.08,1.30)   | 0.29<br>(0.05,1.60)   | 0.35<br>(0.08,1.47)   | 0.90<br>(0.14,5.88)    | 0.64<br>(0.14,2.88)    | 0.53<br>(0.02,12.39)   | 0.55<br>(0.14,2.18)    |
| 0.80<br>(0.12,5.13)   | 0.82<br>(0.20,3.45)               | 1.24<br>(0.29,5.34)    | Teg100                 | 0.31<br>(0.07,1.45)  | 0.28<br>(0.05,1.59)  | 0.03<br>(0.01,0.13) | 0.53<br>(0.14,2.06)   | 0.41<br>(0.09,1.94)   | 0.39<br>(0.10,1.49)   | 0.35<br>(0.07,1.86)   | 0.44<br>(0.11,1.69)   | 1.12<br>(0.18,6.88)    | 0.79<br>(0.19,3.32)    | 0.65<br>(0.03,14.84)   | 0.67<br>(0.18,2.50)    |
| 2.53<br>(0.56,11.44)  | <b>2.61</b><br><b>(1.03,6.63)</b> | 3.93<br>(0.80,19.29)   | 3.18<br>(0.69,14.62)   | Rab20                | 0.90<br>(0.32,2.55)  | 0.10<br>(0.04,0.25) | 1.69<br>(0.75,3.82)   | 1.30<br>(0.44,3.82)   | 1.23<br>(0.60,2.54)   | 1.13<br>(0.33,3.88)   | 1.39<br>(0.62,3.08)   | 3.54<br>(0.83,15.17)   | 2.51<br>(0.95,6.68)    | 2.06<br>(0.11,39.33)   | 2.14<br>(0.98,4.69)    |
| 2.80<br>(0.51,15.45)  | 2.89<br>(0.85,9.87)               | 4.36<br>(0.73,25.82)   | 3.52<br>(0.63,19.71)   | 1.11<br>(0.39,3.14)  | Rab10                | 0.12<br>(0.04,0.37) | 1.87<br>(0.60,5.86)   | 1.44<br>(0.38,5.50)   | 1.37<br>(0.47,4.01)   | 1.25<br>(0.29,5.44)   | 1.54<br>(0.50,4.75)   | 3.93<br>(0.75,20.63)   | 2.79<br>(0.79,9.84)    | 2.29<br>(0.11,48.47)   | 2.37<br>(0.78,7.26)    |
| 24.08<br>(6.18,93.79) | 24.86<br>(12.81,48.23)            | 37.43<br>(8.63,162.37) | 30.27<br>(7.49,122.35) | 9.53<br>(4.07,22.35) | 8.59<br>(2.68,27.59) | Placebo             | 16.09<br>(9.85,26.29) | 12.35<br>(5.28,28.84) | 11.75<br>(7.48,18.44) | 10.73<br>(4.12,27.91) | 13.21<br>(8.40,20.78) | 33.78<br>(9.24,123.57) | 23.95<br>(11.22,51.15) | 19.66<br>(1.10,351.18) | 20.41<br>(12.56,33.17) |
| 1.50<br>(0.39,5.72)   | 1.54<br>(0.83,2.88)               | 2.33<br>(0.56,9.69)    | 1.88<br>(0.49,7.28)    | 0.59<br>(0.26,1.34)  | 0.53<br>(0.17,1.67)  | 0.06<br>(0.04,0.10) | Pan40                 | 0.77<br>(0.32,1.83)   | 0.73<br>(0.50,1.07)   | 0.67<br>(0.24,1.85)   | 0.82<br>(0.55,1.22)   | 2.10<br>(0.59,7.53)    | 1.49<br>(0.76,2.93)    | 1.22<br>(0.07,21.38)   | 1.27<br>(0.90,1.79)    |
| 1.95<br>(0.42,9.09)   | 2.01<br>(0.76,5.36)               | 3.03<br>(0.60,15.38)   | 2.45<br>(0.51,11.67)   | 0.77<br>(0.26,2.27)  | 0.70<br>(0.18,2.66)  | 0.08<br>(0.03,0.19) | 1.30<br>(0.55,3.11)   | Ome40                 | 0.95<br>(0.43,2.12)   | 0.87<br>(0.25,3.03)   | 1.07<br>(0.46,2.51)   | 2.74<br>(0.62,12.06)   | 1.94<br>(0.69,5.43)    | 1.59<br>(0.08,30.90)   | 1.65<br>(0.71,3.86)    |
| 2.05<br>(0.54,7.72)   | <b>2.12</b><br><b>(1.17,3.82)</b> | 3.19<br>(0.77,13.16)   | 2.58<br>(0.67,9.89)    | 0.81<br>(0.39,1.67)  | 0.73<br>(0.25,2.15)  | 0.09<br>(0.05,0.13) | 1.37<br>(0.94,2.00)   | 1.05<br>(0.47,2.35)   | Ome20                 | 0.91<br>(0.33,2.49)   | 1.12<br>(0.80,1.58)   | 2.88<br>(0.81,10.15)   | 2.04<br>(1.06,3.94)    | 1.67<br>(0.10,29.16)   | 1.74<br>(1.28,2.36)    |
| 2.24<br>(0.45,11.30)  | 2.32<br>(0.77,6.93)               | 3.49<br>(0.63,19.43)   | 2.82<br>(0.54,14.80)   | 0.89<br>(0.26,3.06)  | 0.80<br>(0.18,3.49)  | 0.09<br>(0.04,0.24) | 1.50<br>(0.54,4.17)   | 1.15<br>(0.33,4.01)   | 1.10<br>(0.40,2.99)   | Lan60                 | 1.23<br>(0.46,3.29)   | 3.15<br>(0.66,15.04)   | 2.23<br>(0.69,7.20)    | 1.83<br>(0.09,37.47)   | 1.90<br>(0.69,5.25)    |
| 1.82<br>(0.51,6.57)   | <b>1.88</b><br><b>(1.16,3.05)</b> | 2.83<br>(0.68,11.79)   | 2.29<br>(0.59,8.87)    | 0.72<br>(0.32,1.60)  | 0.65<br>(0.21,2.01)  | 0.08<br>(0.05,0.12) | 1.22<br>(0.82,1.80)   | 0.93<br>(0.40,2.19)   | 0.89<br>(0.63,1.25)   | 0.81<br>(0.30,2.17)   | Lan30                 | 2.56<br>(0.76,8.62)    | 1.81<br>(0.92,3.57)    | 1.49<br>(0.09,26.03)   | 1.54<br>(1.10,2.17)    |

|                      |                      |                      |                      |                     |                     |                     |                      |                      |                                   |                      |                                   |                      |                      |                      |                      |
|----------------------|----------------------|----------------------|----------------------|---------------------|---------------------|---------------------|----------------------|----------------------|-----------------------------------|----------------------|-----------------------------------|----------------------|----------------------|----------------------|----------------------|
| 0.71<br>(0.12,4.17)  | 0.74<br>(0.20,2.72)  | 1.11<br>(0.17,7.22)  | 0.90<br>(0.15,5.52)  | 0.28<br>(0.07,1.21) | 0.25<br>(0.05,1.33) | 0.03<br>(0.01,0.11) | 0.48<br>(0.13,1.71)  | 0.37<br>(0.08,1.61)  | 0.35<br>(0.10,1.23)               | 0.32<br>(0.07,1.52)  | 0.39<br>(0.12,1.32)               | Kev20                | 0.71<br>(0.18,2.85)  | 0.58<br>(0.03,13.04) | 0.60<br>(0.17,2.13)  |
| 1.01<br>(0.24,4.28)  | 1.04<br>(0.45,2.38)  | 1.56<br>(0.35,7.03)  | 1.26<br>(0.30,5.30)  | 0.40<br>(0.15,1.06) | 0.36<br>(0.10,1.27) | 0.04<br>(0.02,0.09) | 0.67<br>(0.34,1.32)  | 0.52<br>(0.18,1.44)  | <b>0.49</b><br><b>(0.25,0.95)</b> | 0.45<br>(0.14,1.44)  | 0.55<br>(0.28,1.09)               | 1.41<br>(0.35,5.67)  | Ila10                | 0.82<br>(0.05,14.93) | 0.85<br>(0.47,1.53)  |
| 1.22<br>(0.05,28.17) | 1.26<br>(0.07,23.02) | 1.90<br>(0.08,44.90) | 1.54<br>(0.07,35.16) | 0.48<br>(0.03,9.24) | 0.44<br>(0.02,9.26) | 0.05<br>(0.00,0.91) | 0.82<br>(0.05,14.32) | 0.63<br>(0.03,12.18) | 0.60<br>(0.03,10.40)              | 0.55<br>(0.03,11.15) | 0.67<br>(0.04,11.75)              | 1.72<br>(0.08,38.48) | 1.22<br>(0.07,22.16) | Fex40                | 1.04<br>(0.06,17.78) |
| 1.18<br>(0.31,4.45)  | 1.22<br>(0.67,2.20)  | 1.83<br>(0.46,7.33)  | 1.48<br>(0.40,5.50)  | 0.47<br>(0.21,1.02) | 0.42<br>(0.14,1.29) | 0.05<br>(0.03,0.08) | 0.79<br>(0.56,1.11)  | 0.60<br>(0.26,1.41)  | <b>0.58</b><br><b>(0.42,0.78)</b> | 0.53<br>(0.19,1.45)  | <b>0.65</b><br><b>(0.46,0.91)</b> | 1.66<br>(0.47,5.85)  | 1.17<br>(0.65,2.11)  | 0.96<br>(0.06,16.51) | Eso40                |

**Table S7 Odds ratios of relative 8-week healing rate for each treatment in the subgroup analysis on patients without severe baseline grade**

|                        |                       |                        |                     |                                   |                       |                                   |                          |                      |
|------------------------|-----------------------|------------------------|---------------------|-----------------------------------|-----------------------|-----------------------------------|--------------------------|----------------------|
| Vpz40                  | 0.49<br>(0.10,2.43)   | 0.73<br>(0.03,17.50)   | 0.03<br>(0.01,0.18) | 0.18<br>(0.03,1.07)               | 0.36<br>(0.06,2.02)   | 0.56<br>(0.11,2.94)               | 4.19<br>(0.14,126.73)    | 0.30<br>(0.05,1.74)  |
| 2.05<br>(0.41,10.22)   | Vpz20                 | 1.50<br>(0.09,25.71)   | 0.06<br>(0.02,0.18) | 0.36<br>(0.12,1.10)               | 0.74<br>(0.28,1.96)   | 1.15<br>(0.49,2.71)               | 8.60<br>(0.39,190.86)    | 0.61<br>(0.21,1.75)  |
| 1.37<br>(0.06,32.90)   | 0.67<br>(0.04,11.47)  | Rab20                  | 0.04<br>(0.00,0.64) | 0.24<br>(0.02,3.69)               | 0.50<br>(0.03,7.19)   | 0.77<br>(0.05,11.51)              | 5.74<br>(0.10,321.96)    | 0.41<br>(0.03,6.08)  |
| 32.52<br>(5.63,187.75) | 15.84<br>(5.66,44.31) | 23.72<br>(1.56,360.89) | Placebo             | 5.72<br>(2.68,12.20)              | 11.79<br>(7.00,19.85) | 18.18<br>(10.34,31.95)            | 136.24<br>(6.58,2822.24) | 9.66<br>(4.97,18.78) |
| 5.68<br>(0.93,34.59)   | 2.77<br>(0.91,8.45)   | 4.15<br>(0.27,63.45)   | 0.17<br>(0.08,0.37) | Pan40                             | 2.06<br>(1.19,3.57)   | 3.18<br>(1.56,6.47)               | 23.82<br>(1.11,508.71)   | 1.69<br>(1.14,2.50)  |
| 2.76<br>(0.49,15.41)   | 1.34<br>(0.51,3.55)   | 2.01<br>(0.14,29.11)   | 0.08<br>(0.05,0.14) | <b>0.49</b><br><b>(0.28,0.84)</b> | Ome20                 | 1.54<br>(0.98,2.42)               | 11.56<br>(0.57,234.90)   | 0.82<br>(0.54,1.24)  |
| 1.79<br>(0.34,9.41)    | 0.87<br>(0.37,2.06)   | 1.30<br>(0.09,19.61)   | 0.06<br>(0.03,0.10) | <b>0.31</b><br><b>(0.15,0.64)</b> | 0.65<br>(0.41,1.02)   | Lan30                             | 7.50<br>(0.38,147.27)    | 0.53<br>(0.29,0.98)  |
| 0.24<br>(0.01,7.22)    | 0.12<br>(0.01,2.58)   | 0.17<br>(0.00,9.76)    | 0.01<br>(0.00,0.15) | <b>0.04</b><br><b>(0.00,0.90)</b> | 0.09<br>(0.00,1.76)   | 0.13<br>(0.01,2.62)               | Kev20                    | 0.07<br>(0.00,1.48)  |
| 3.37<br>(0.57,19.75)   | 1.64<br>(0.57,4.71)   | 2.46<br>(0.16,36.68)   | 0.10<br>(0.05,0.20) | <b>0.59</b><br><b>(0.40,0.88)</b> | 1.22<br>(0.81,1.85)   | <b>1.88</b><br><b>(1.02,3.47)</b> | 14.11<br>(0.67,294.92)   | Eso40                |

**Table S8 Odds ratios of relative 8-week healing rate for each treatment in the subgroup analysis on patients with severe baseline grade**

|                        |                         |                        |                     |                         |                        |                       |                        |                           |                         |
|------------------------|-------------------------|------------------------|---------------------|-------------------------|------------------------|-----------------------|------------------------|---------------------------|-------------------------|
| Vpz40                  | 1.55<br>(0.23,10.36)    | 0.76<br>(0.08,7.66)    | 0.02<br>(0.00,0.14) | 0.88<br>(0.13,6.07)     | 0.76<br>(0.13,4.60)    | 0.53<br>(0.06,4.44)   | 0.78<br>(0.14,4.31)    | 4.36<br>(0.25,76.32)      | 1.35<br>(0.22,8.14)     |
| 0.65<br>(0.10,4.31)    | Vpz20                   | 0.49<br>(0.08,3.00)    | 0.01<br>(0.00,0.05) | 0.57<br>(0.17,1.88)     | 0.49<br>(0.17,1.45)    | 0.34<br>(0.07,1.68)   | 0.51<br>(0.19,1.33)    | 2.81<br>(0.23,34.10)      | 0.87<br>(0.31,2.47)     |
| 1.31<br>(0.13,13.24)   | 2.04<br>(0.33,12.44)    | Rab20                  | 0.03<br>(0.01,0.15) | 1.16<br>(0.21,6.32)     | 1.00<br>(0.24,4.26)    | 0.70<br>(0.10,5.00)   | 1.03<br>(0.22,4.90)    | 5.73<br>(0.36,92.23)      | 1.77<br>(0.37,8.47)     |
| 44.80<br>(7.01,286.15) | 69.43<br>(20.79,231.83) | 34.07<br>(6.47,179.37) | Placebo             | 39.52<br>(14.07,110.99) | 34.10<br>(15.11,76.92) | 23.80<br>(7.57,74.81) | 35.16<br>(16.93,73.05) | 195.34<br>(17.49,2182.21) | 60.34<br>(25.98,140.16) |
| 1.13<br>(0.16,7.80)    | 1.76<br>(0.53,5.80)     | 0.86<br>(0.16,4.70)    | 0.03<br>(0.01,0.07) | Pan40                   | 0.86<br>(0.36,2.09)    | 0.60<br>(0.14,2.66)   | 0.89<br>(0.36,2.19)    | 4.94<br>(0.42,58.41)      | 1.53<br>(0.80,2.91)     |
| 1.31<br>(0.22,7.94)    | 2.04<br>(0.69,6.02)     | 1.00<br>(0.23,4.25)    | 0.03<br>(0.01,0.07) | 1.16<br>(0.48,2.80)     | Ome20                  | 0.70<br>(0.18,2.65)   | 1.03<br>(0.58,1.83)    | 5.73<br>(0.54,61.34)      | 1.77<br>(0.98,3.21)     |
| 1.88<br>(0.23,15.72)   | 2.92<br>(0.59,14.31)    | 1.43<br>(0.20,10.25)   | 0.04<br>(0.01,0.13) | 1.66<br>(0.38,7.32)     | 1.43<br>(0.38,5.43)    | Lan60                 | 1.48<br>(0.42,5.24)    | 8.21<br>(0.59,113.33)     | 2.54<br>(0.66,9.75)     |
| 1.27<br>(0.23,7.00)    | 1.97<br>(0.75,5.19)     | 0.97<br>(0.20,4.60)    | 0.03<br>(0.01,0.06) | 1.12<br>(0.46,2.76)     | 0.97<br>(0.55,1.72)    | 0.68<br>(0.19,2.40)   | Lan30                  | 5.56<br>(0.56,55.41)      | 1.72<br>(0.97,3.04)     |
| 0.23<br>(0.01,4.01)    | 0.36<br>(0.03,4.31)     | 0.17<br>(0.01,2.81)    | 0.01<br>(0.00,0.06) | 0.20<br>(0.02,2.39)     | 0.17<br>(0.02,1.87)    | 0.12<br>(0.01,1.68)   | 0.18<br>(0.02,1.80)    | Kev20                     | 0.31<br>(0.03,3.30)     |
| 0.74<br>(0.12,4.49)    | 1.15<br>(0.40,3.27)     | 0.56<br>(0.12,2.70)    | 0.02<br>(0.01,0.04) | 0.65<br>(0.34,1.25)     | 0.57<br>(0.31,1.02)    | 0.39<br>(0.10,1.52)   | 0.58<br>(0.33,1.03)    | 3.24<br>(0.30,34.63)      | Eso40                   |

**Table S9 Odds ratios of pooled 4-week vs 8-week healing rate by each treatment**

|        | Pooled healing rate (% , 95%CI) |               | OR    | 95%CI       | <i>P</i> |
|--------|---------------------------------|---------------|-------|-------------|----------|
|        | 4-week                          | 8-week        |       |             |          |
| Teg50  | 88%(80%~94%)                    | 96%(90%~99%)  | 0.303 | 0.094~0.978 | <0.001   |
| Kev20  | 82%(74%~89%)                    | 96%(90%~99%)  | 0.205 | 0.074~0.563 | <0.001   |
| Teg100 | 90%(83%~95%)                    | 95%(89%~98%)  | 0.474 | 0.156~1.440 | 0.188    |
| Vpz20  | 93%(85%~98%)                    | 96%(92%~98%)  | 0.473 | 0.286~0.782 | 0.003    |
| Ila10  | 77%(73%~81%)                    | 86%(80%~90%)  | 0.61  | 0.431~0.865 | <0.001   |
| Vpz40  | 97%(93%~99%)                    | 97%(93%~99%)  | 1     | 0.245~4.084 | 1        |
| Eso40  | 76%(72%~80%)                    | 91%(88%~93%)  | 0.322 | 0.262~0.396 | <0.001   |
| Fex40  | 90%(83%~95%)                    | 99%(95%~100%) | 0.088 | 0.011~0.698 | <0.001   |
| Pan40  | 73%(69%~77%)                    | 92%(89%~95%)  | 0.301 | 0.243~0.373 | <0.001   |
| Lan30  | 77%(69%~94%)                    | 88%(84%~91%)  | 0.438 | 0.360~0.533 | <0.001   |
| Ome40  | 44%(34%~55%)                    | 73%(62%~91%)  | 0.298 | 0.160~0.553 | <0.001   |
| Lan60  | 76%(65%~85%)                    | 89%(79%~95%)  | 0.406 | 0.171~0.964 | <0.001   |
| Ome20  | 73%(64%~80%)                    | 88%(84%~91%)  | 0.355 | 0.290~0.436 | <0.001   |
| Rab20  | 88%(85%~91%)                    | 94%(89%~98%)  | 0.399 | 0.207~0.767 | <0.001   |
| Rab10  | 85%(77%~92%)                    | 91%(84%~96%)  | 0.562 | 0.234~1.349 | 0.197    |
